# Supplementary material for: Preparation and Characterization of Thermo-Responsive Rod-Coil Diblock Copolymers
Source: MDPI journal article supplement (doi:10.3390/polym9080340), 2017-08-04
Supplement: s1 [file s1]

The supporting information

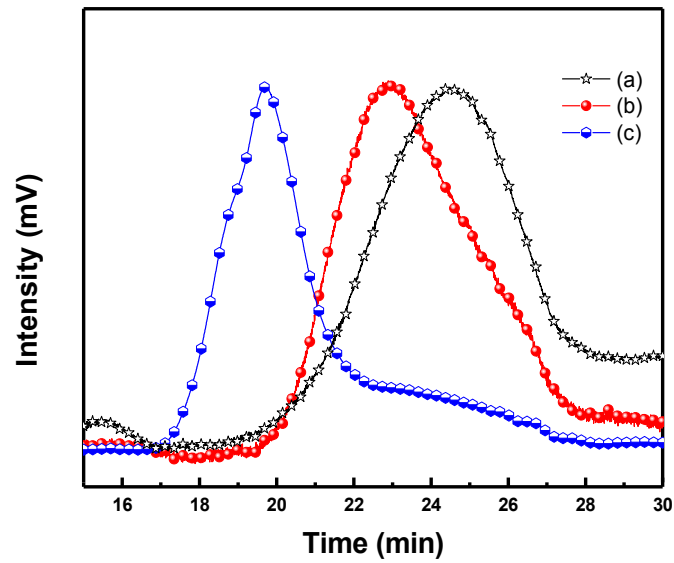

**Figure S1.** GPC curves of the prepared (a) POF<sub>10</sub>; (b) POF<sub>10</sub>-b-PDMAEMA<sub>90</sub> and (c) POF<sub>10</sub>-b-PDMAEMA<sub>197</sub>.
